# Supplementary material
Source: MDPI journal article supplement (https://www.mdpi.com/2075-4701/8/5/338)
Supplement: s1 [file s1]

## Sheet: Input data and results VCM
Input data and results VCM
Article: The scrap collection per industry sector and the circulation times of steel in US between 1900 and 2016 calculated based on the Volume Correlation Model
Units: ton and years	Description:
	Unit: ton																			1900	1901	1902	1903	1904	1905	1906	1907	1908	1909	1910	1911	1912	1913	1914	1915	1916	1917	1918	1919	1920	1921	1922	1923	1924	1925	1926	1927	1928	1929
Total steel consumption																				9500000	12000000	14000000	13000000	12000000	17000000	20000000	20000000	12000000	20000000	22000000	19000000	25000000	25000000	17300000	21600000	27600000	28100000	26700000	21600000	28300000	12900000	25000000	32000000	26700000	32100000	33800000	31300000	35800000	39000000
Construction																				7.69472e+06	9.72048e+06	1.13401e+07	1.05296e+07	9.71992e+06	1.37701e+07	1.62003e+07	1.62004e+07	9.71972e+06	1.61998e+07	1.78204e+07	1.53899e+07	2.02497e+07	2.02498e+07	1.40129e+07	1.73883e+07	2.22184e+07	2.26203e+07	2.14937e+07	1.73875e+07	2.26398e+07	10320000	1.99998e+07	2.56002e+07	2.13596e+07	2.53584e+07	2.67021e+07	2.47268e+07	2.82822e+07	3.08096e+07
Consumer Goods																				0	0	0	0	0	0	0	0	0	0	0	0	0	0	0	0	0	0	0	0	0	0	0	0	0	0	0	0	0	0
Industrial Goods																				1.80528e+06	2.27952e+06	2.65992e+06	2.47041e+06	2.28008e+06	3.2299e+06	3.79969e+06	3.79959e+06	2.28028e+06	3.80018e+06	3.9596e+06	3.42044e+06	4.49981e+06	4.50019e+06	3.11386e+06	3.88773e+06	4.96788e+06	5.05792e+06	4.80603e+06	3.88816e+06	5.23529e+06	2.38667e+06	4.62489e+06	5.91973e+06	4.93971e+06	6.09933e+06	6.42209e+06	5.94733e+06	6.80203e+06	7.4101e+06
Automotive																				0	0	0	0	0	0	0	0	0	0	219978	189673	250520	250011	173263	323978	413706	421764	400243	324287	424890	193329	375296	480081	400669	642283	675813	625889	715762	780348
Total collected scrap																				4006918	4.38242e+06	4.80948e+06	5.2977e+06	5.15891e+06	5679177	6693524	7.347e+06	4.51258e+06	7.73429e+06	8243444	6.60317e+06	1.29457e+06	9.65657e+06	8.83309e+06	9800044	1.2217e+07	1.4145e+07	1.11837e+07	1.12807e+07	16804790	9130426	15541782	14474436	15762962	17983882	19077498	19094956	22542956	24011862
Construction																				4006918	4.25699e+06	4.55189e+06	4.89784e+06	4.66934e+06	5.04185e+06	5.83829e+06	6.30516e+06	3.81522e+06	6.44933e+06	6.78639e+06	5.36539e+06	1.03916e+06	7.66378e+06	6.93602e+06	7.61887e+06	9.40919e+06	1.07983e+07	8.46681e+06	8.47328e+06	1.25289e+07	6.75932e+06	1.14288e+07	1.05763e+07	1.14482e+07	1.2986e+07	1.37e+07	1.36405e+07	1.60228e+07	1.69849e+07
Consumer Goods																				0	0	0	0	0	0	0	0	0	0	0	0	0	0	0	0	0	0	0	0	0	0	0	0	0	0	0	0	0	0
Industrial Goods																				0	125434	257589	399862	489568	637324	855237	1.04185e+06	697362	1.28496e+06	1.45706e+06	1.23008e+06	252508	1.96165e+06	1.86049e+06	2.13227e+06	2.73716e+06	3.25451e+06	2.63628e+06	2.71883e+06	4.13371e+06	2.28863e+06	3.96419e+06	3.75218e+06	4.14824e+06	4.79974e+06	5.15908e+06	5.22794e+06	6.24396e+06	6.72386e+06
Automotive																				0	0	0	0	0	0	0	0	0	0	0	7694.03	2895.6	31146.7	36574.1	48902.8	70622.9	92203.6	80616.4	88610.5	142208	82482.5	148774	145919	166492	198145	218440	226479	276177	303101
US lifetime of steel	Unit: years
True lifetime																				0	1	2	3	3	4	4	5	6	6	6	7	8	8	9	9	10	10	10	11	11	11	12	12	12	13	13	13	13	13
Apparent lifetime																				0	0	0	0	0	0	1	1	2	1	1	2	3	3	2	2	2	2	3	3	3	4	3	4	3	3	4	4	4	4
True lifetime (i)	Construction																			0	1	2	2	3	4	4	4	5	5	6	7	7	8	9	9	10	9	10	10	11	11	12	12	12	13	13	13	13	13
	Consumer Goods																			0	0	0	0	0	0	0	0	0	0	0	0	0	0	0	0	0	0	0	0	0	0	0	0	0	0	0	0	0	0
	Industrial Goods																			0	1	2	3	4	5	6	7	7	8	8	9	10	10	10	11	11	11	11	11	11	11	11	12	12	11	11	11	11	10
	Automotive																			0	0	0	0	0	0	0	0	0	0	0	1	2	3	4	5	6	7	8	8	9	9	10	10	10	11	11	12	12	12
Apparent lifetime (i)	Construction																			0	0	0	0	0	0	1	1	2	1	1	2	3	3	2	2	2	2	3	3	3	4	3	4	3	4	4	4	4	4
	Consumer Goods																			0	0	0	0	0	0	0	0	0	0	0	0	0	0	0	0	0	0	0	0	0	0	0	0	0	0	0	0	0	0
	Industrial Goods																			0	0	1	1	1	1	1	1	2	1	1	2	3	2	2	2	2	2	2	3	3	3	3	3	3	3	3	3	3	4
	Automotive																			0	0	0	0	0	0	0	0	0	0	0	0	0.5	1	1	2	2	2	3	4	4	5	5	5	5	6	5	6	6	6
Apparent recovery rate (i)	Construction																			0	0.488881	0.474892	0.4987	0.476417	0.481898	0.517479	0.529981	0.327345	0.532584	0.537378	0.417255	0.0773917	0.550771	0.498235	0.538898	0.643883	0.717114	0.549908	0.546794	0.79114	0.433686	0.724368	0.653388	0.698326	0.775811	0.800811	0.768982	0.86958	0.887078
	Consumer Goods																			0	0	0	0	0	0	0	0	0	0	0	0	0	0	0	0	0	0	0	0	0	0	0	0	0	0	0	0	0	0
	Industrial Goods																			0	0.061415	0.114574	0.173568	0.212945	0.259689	0.32317	0.373349	0.255084	0.452375	0.495224	0.412491	0.0814853	0.613221	0.582633	0.658788	0.81988	0.947726	0.751887	0.771229	1.1461	0.644449	1.10178	1.01555	1.10782	1.18745	1.22431	1.19542	1.37878	1.38856
	Automotive																			0	0	0	0	0	0	0	0	0	0	0	0.0563457	0.0219307	0.239542	0.303815	0.38221	0.504136	0.616639	0.518505	0.507638	0.796492	0.437068	0.788765	0.69	0.722131	0.831028	0.815633	0.834403	0.920415	0.914964
Global lifetime of steel
Apparent lifetime																				0	1	2	3	4	5	6	7	8	9	10	11	11	12	13	14	14	15	16	17	18	19	19	20	21	22	22	23	24	25
True lifetime																				0	0	0	0	0	0	1	1	1	1	1	2	2	2	3	3	3	3	4	4	4	5	6	6	6	6	5	5	5	5
Swedish lifetime of steel
Apparent lifetime																				0	1	2	3	4	5	6	6	7	8	8	9	10	10	11	11	12	12	12	12	13	13	14	14	15	15	16	16	17	17
True lifetime																				0	0	0	1	1	1	1	1	1	2	2	2	3	3	3	4	4	4	4	4	4	5	5	5	6	6	6	6	6	7
[truncated: 87 more columns]
